# Supplementary material for: Revealing the dynamics of a local Alpine windstorm using large-eddy simulations
Source: Copernicus journal article supplement (doi:10.5194/wcd-6-447-2025), 2025-04-17
Supplement: Supplementary file 2 [file wcd-6-447-2025-supplement.zip]

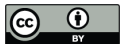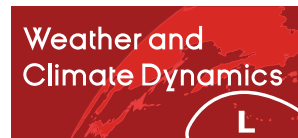

Open Access

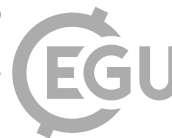

## *Supplement of*

# **Revealing the dynamics of a local Alpine windstorm using large-eddy simulations**

**Nicolai Krieger et al.**

*Correspondence to:* Nicolai Krieger ([nicolai.krieger@env.ethz.ch](mailto:nicolai.krieger@env.ethz.ch))

- [wcd-6-447-2025-supplement-title-page.pdf](#)
- [egusphere-2024-3461\\_supplement.pdf](#)
- [supplement\\_animation.gif](#)

The copyright of individual parts of the supplement might differ from the article licence.
